# Supplementary material for: High performance solution-processable tetrathienoacene (TTAR) based small molecules for organic field effect transistors (OFETs)
Source: Royal Society of Chemistry journal article supplement (doi:10.1039/c7cc02714a), 2017-01-01
Supplement: c7cc02714a1.pdf [file c7cc02714a1.pdf]

## Electronic Supplementary Information (ESI)

### High Performance Solution-processable Tetrathienoacene (TTAR) based Small Molecules for Organic Field Effect Transistors (OFETs)

Sureshraj V. Vegiraju,<sup>‡a</sup> Deng-Yi Huang,<sup>‡b</sup> Pragya Priyanka,<sup>a</sup> Yo-Shan Li,<sup>a</sup> Xian-Lun Luo,<sup>b</sup>  
Shao-Huan Hong,<sup>b</sup> Jen-Shyang Ni,<sup>c</sup> Shih-Huang Tung,<sup>d</sup> Chien-Lung Wang,<sup>e</sup> Wei-Chieh Lien,<sup>a</sup>  
Shueh Lin Yau,<sup>a</sup> Cheng-Liang Liu<sup>\*b</sup> and Ming-Chou Chen<sup>\*a</sup>

---

<sup>a</sup>Department of Chemistry, National Central University, Taoyuan, 32001 Taiwan. E-mail: mcchen@ncu.edu.tw

<sup>b</sup>Department of Chemical and Materials Engineering, National Central University, Taoyuan, 32001 Taiwan. E-mail: clliu@ncu.edu.tw

<sup>c</sup>Institute of Chemistry, Academia Sinica, Taipei, 11529 Taiwan.

<sup>d</sup>Institute of Polymer Science and Engineering, National Taiwan University, Taipei, 10617 Taiwan.

<sup>e</sup>Department of Applied Chemistry, National Chiao Tung University, Hsinchu, 30010 Taiwan.

<sup>‡</sup> These authors contributed equally.

## Experimental Section

### Materials

All chemicals and solvents were of reagent or anhydrous grade and were obtained from Aldrich, Alfa and TCI Chemical Co. Solvents for reactions (toluene and THF) were distilled under nitrogen from sodium/benzophenone ketyl, and halogenated solvents were distilled from  $\text{CaH}_2$ . Dibromotetrathienoacene (4),<sup>1</sup> tributyl(dithieno[3,2-b:2',3'-d]thiophen-2-yl)stannane (5),<sup>2</sup> tributyl(thieno[3,2-b]thiophen-2-yl)stannane (6),<sup>3</sup> tributyl(thiophen-2-yl)stannane (7)<sup>4</sup> were prepared according to the procedures described in the literature. The silane agent for the self-assembly monolayer (SAM) treatment, (2-phenylethyl)trichlorosilane (PETS) or octadecyltrimethoxysilane (ODTS), was supplied from Gelest, Inc.

### General characterization methods

$^1\text{H}$  and  $^{13}\text{C}$  NMR were recorded using a Bruker 500 or 300 instrument for all materials, with reference to solvent signals. Elemental analyses were performed on a Heraeus CHN-O-Rapid elemental analyzer. Mass spectrometric data were obtained with a JMS-700 HRMS instrument. Differential scanning calorimetry (DSC) was carried out under nitrogen on a Mettler DSC 822 instrument (scanning rate of  $10\text{ }^\circ\text{C min}^{-1}$ ). Thermogravimetric analysis (TGA) was carried out using a Perkin Elmer TGA-7 thermal analysis system, using dry nitrogen as a carrier gas at a flow rate of  $10\text{ mL min}^{-1}$  (heating rate of  $10\text{ }^\circ\text{C min}^{-1}$ ), and reported decomposition temperatures represent the temperature observed at 5 % mass loss. UV-Vis absorption was carried out in the indicated solvents at room temperature with a JASCO V-530 spectrometer. Differential pulse voltammetry (DPV) experiments were performed with a conventional three-electrode configuration (a platinum disk working electrode, an auxiliary platinum wire electrode, and a non-aqueous Ag reference electrode, with a supporting electrolyte of 0.1 M tetrabutylammoniumhexafluorophosphate ( $\text{TBAPF}_6$ ) in the specified dry solvent) using a

CHI621C Electrochemical Analyzer (CH Instruments). All electrochemical potentials were referenced to an Fc<sup>+</sup>/Fc internal standard (at 0.6 V). The surface morphology of solution-sheared organic semiconductor thin film was observed by polarized optical microscopy (POM; Leica 2700M) and atomic force microscopy (tapping mode AFM; Seiko SPA400). Grazing incident X-ray diffraction (GIXRD) was collected at beamline B13A1 and B17A1 at the National Synchrotron Radiation Research Center (NSRRC, Taiwan).

### **General procedures for the target compounds (1-3)**

Under anhydrous conditions, Pd(PPh<sub>3</sub>)<sub>4</sub> (0.05 equiv.) was added to a solution of dibromotetrathienoacene (**4**, 1 equiv.) and mono-stannylated compounds (**5-7**; 2.3 equiv.) in dry toluene. The resulting mixture was refluxed overnight under nitrogen. After filtration through silica and removal of the solvent, the desired product was collected by filtration, washed with hexanes, and recrystallized from toluene, thus producing highly pure target molecules for device fabrication.

### **Compound DT-TTAR (1)**

The title compound was obtained as a pale yellow solid (yield = 71%). Mp: 120 °C. <sup>1</sup>H NMR (300 MHz, CDCl<sub>3</sub>): δ 7.34 (d, *J* = 4.8 Hz, 2 H), 7.19 (d, *J* = 3.6 Hz, 2 H), 7.11 (t, *J* = 4.4 Hz, 2 H), 2.91 (t, *J* = 8.1 Hz, 4 H), 1.78 (m, 4 H), 1.26 (br, 48 H), 0.88 (t, *J* = 6.9 Hz, 6 H). <sup>13</sup>C NMR (125 MHz, CDCl<sub>3</sub>): δ 142.48, 136.32, 133.02, 132.06, 131.16, 129.37, 127.53, 126.48, 125.98, 31.94, 29.67, 29.54, 29.36, 29.07, 28.78, 22.68, 14.05. HRMS (*m/z*, FAB<sup>+</sup>) calcd for C<sub>48</sub>H<sub>68</sub>S<sub>6</sub>: 836.3645, found 836.3655.

### **Compound DTT-TTAR (2)**

The title compound was obtained as a yellow solid (yield = 81%). Mp: 161 °C. <sup>1</sup>H NMR (300 MHz, CDCl<sub>3</sub>): δ 7.41 (d, *J* = 5.5 Hz, 2 H), 7.36 (s, 2 H), 7.27 (d, *J* = 7.0 Hz, 2 H), 2.97 (t, *J* =

8.0 Hz, 4 H), 1.82 (m, 4 H), 1.27 (br, 48 H), 0.88 (t,  $J = 7.0$  Hz, 6 H).  $^{13}\text{C}$  NMR (75 MHz,  $\text{CDCl}_3$ ):  $\delta$  142.66, 139.65, 139.56, 138.02, 133.56, 132.25, 131.44, 129.78, 127.40, 119.42, 118.68, 31.95, 29.68, 29.55, 29.36, 29.18, 28.86, 22.68, 14.05. HRMS ( $m/z$ , FAB+) was calcd. for  $\text{C}_{52}\text{H}_{68}\text{S}_8$  948.3087, and 948.3096 was found.

### **Compound DT-TTAR (3)**

The title compound was obtained as an orange solid (yield = 85%). Mp: 168 °C.  $^1\text{H}$  NMR (300 MHz,  $\text{CDCl}_3$ ):  $\delta$  7.40 (d,  $J = 5.0$  Hz, 2 H), 7.38 (s, 2 H), 7.32 (d,  $J = 5.5$  Hz, 2 H), 2.99 (t,  $J = 8.5$  Hz, 4 H), 1.84 (m, 4 H), 1.26 (br, 48 H), 0.88 (t,  $J = 7.0$  Hz, 6 H). This material was insufficiently soluble to obtain a  $^{13}\text{C}$  NMR spectrum (as shown in Fig. S9,  $^{13}\text{C}$  NMR ( $\text{CDCl}_3$ ) of **DDTT-TTAR**). HRMS ( $m/z$ , FAB+) was calcd. for  $\text{C}_{56}\text{H}_{68}\text{S}_{10}$  1060.2528, and 1060.2526 was found.

### **OFET fabrication and measurement**

Bare Si/SiO<sub>2</sub> wafer pieces were used as a substrate, where highly n-doped Si and 300 nm-thick SiO<sub>2</sub> served as the bottom gate electrode and dielectric layer, respectively. The clean substrate was treated by PETS (immersion in a solution of 1  $\mu\text{l ml}^{-1}$  in toluene, kept at 50 °C for 90 min) to form SAM. The organic active layer was deposited on the OTS-treated substrate by solution-shearing in ambient atmosphere from chlorobenzene or 1,2,3,4-tetrahydronaphthalene (tetralin) solution with a concentration of 2~3 mg ml<sup>-1</sup>. The shearing rate was controlled at 5~30  $\mu\text{m s}^{-1}$  and the substrate was heated at 60~150 °C. The resulting film was then annealed at 50 °C under a vacuum for 30 min to remove the solvent residue. Au source/drain electrodes with a thickness of 80 nm were deposited on top of the organic semiconductor layer through a shadow mask with length (L)/width (W) of 25/1000  $\mu\text{m}$ . The OFET measurements were carried out at room temperature inside a N<sub>2</sub>-filled glove box with a Keithley 4200-SCS semiconductor

parameter analyzer. Field effect mobility ( $\mu$ ) and threshold voltage ( $V_{th}$ ) were extracted in the saturation region using the following relationship:

$$I_d = \frac{W}{2L} C\mu (V_g - V_{th})^2 \quad (1)$$

where  $I_d$  is the drain current,  $V_g$  is the drain voltage and  $C$  is the oxide capacitance. The  $\mu$  and  $V_{th}$  can be estimated from the slope and intercept of the linear section of the plot of  $I_d^{1/2}$  vs  $V_g$ , respectively. The average TFT characteristics with standard deviations were obtained from more than ten devices originating from 3-4 semiconductor depositions.

### DFT calculation

All theoretical computations were performed with Gaussian 03 software using the B3LYP/6-31G\* level.

### References

1. N. Zhou, S. Vegiraju, X. Yu, E. F. Manley, M. R. Butler, M. J. Leonardi, P. Guo, W. Zhao, Y. Hu, K. Prabakaran, R. P. H. Chang, M. A. Ratner, L. X. Chen, A. Facchetti, M.-C. Chen and T. J. Marks, *J. Mater. Chem. C.*, 2015, **3**, 8932-8941.
2. M.-C. Chen, S. Vegiraju, C.-M. Huang, P.-Y. Huang, K. Prabakaran, S. L. Yau, W.-C. Chen, W.-T. Peng, I. Chao, C. Kim and Y.-T. Tao, *J. Mater. Chem. C.*, 2014, **2**, 8892-8902.
3. S. Vegiraju, Y.-Y. Liu, K. Prabakaran, J.-S. Ni, Y. Ezhumalai, H.-C. Yu, S. L. Yau, J. T. Lin, M.-C. Chen and T.-C. Lin, *RSC. Adv.*, 2015, **5**, 54003-54010.
4. P. Priyanka, S. Vegiraju, J.-Y. Lin, J.-S. Ni, H.-Y. Huang, R. Dwi Agustin, S. L. Yau, T.-C. Lin and M.-C. Chen, *Dyes. Pigm.*, 2016, **133**, 65-72.

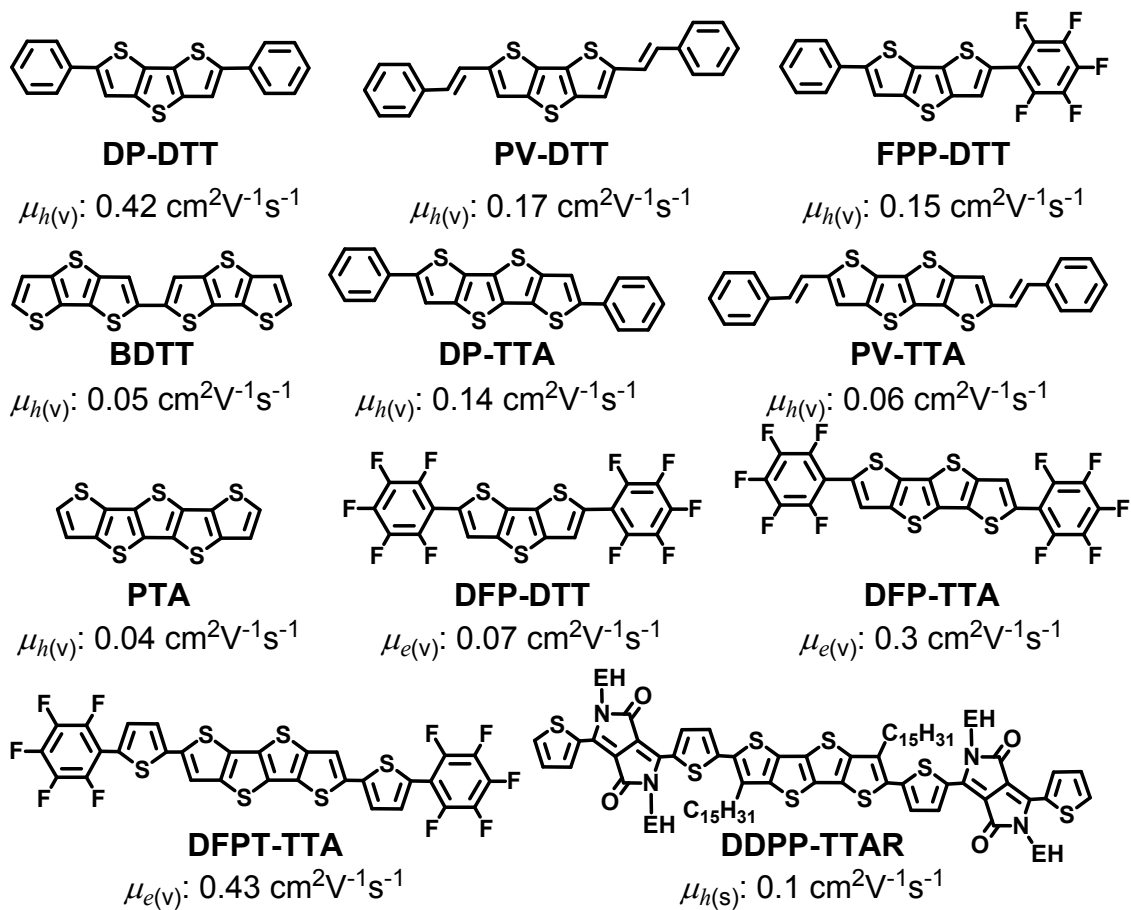

**Fig. S1** Examples of fused thiophene-based small organic semiconductors for p and n-channel OFETs. ((v) denotes vacuum deposition and (s) a solution process)).

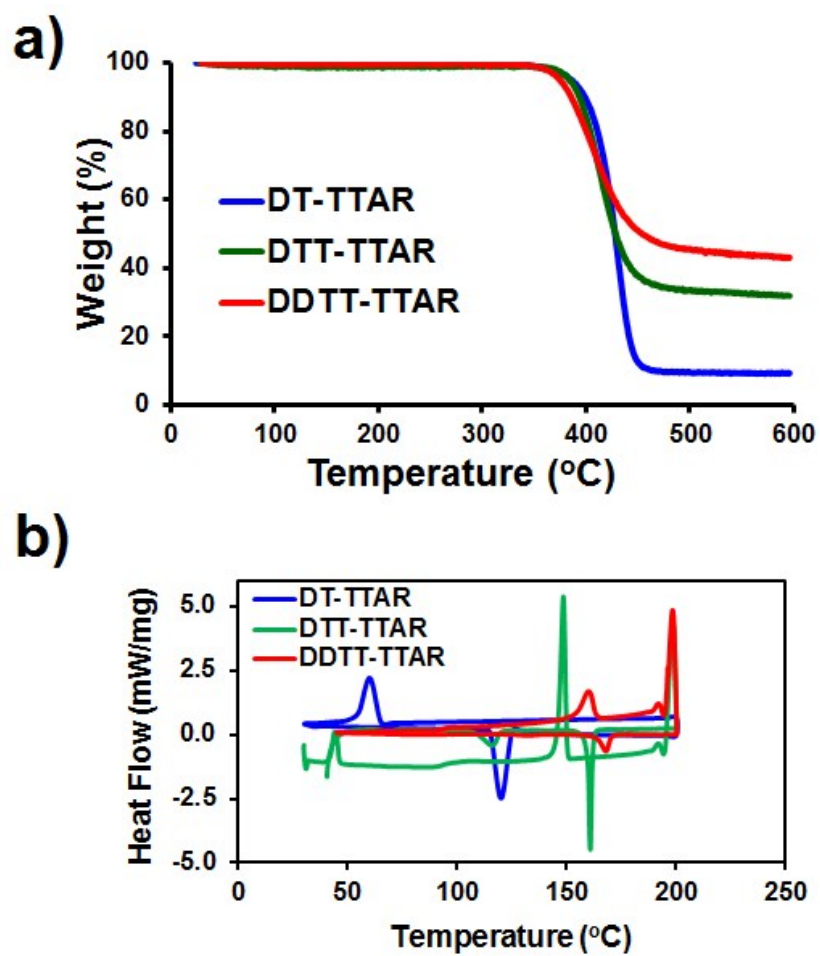

**Fig. S2** (a) TGA and (b) DSC curves of **DT-TTAR**, **DTT-TTAR**, and **DDTT-TTAR** measured in the  $N_2$  atmosphere.

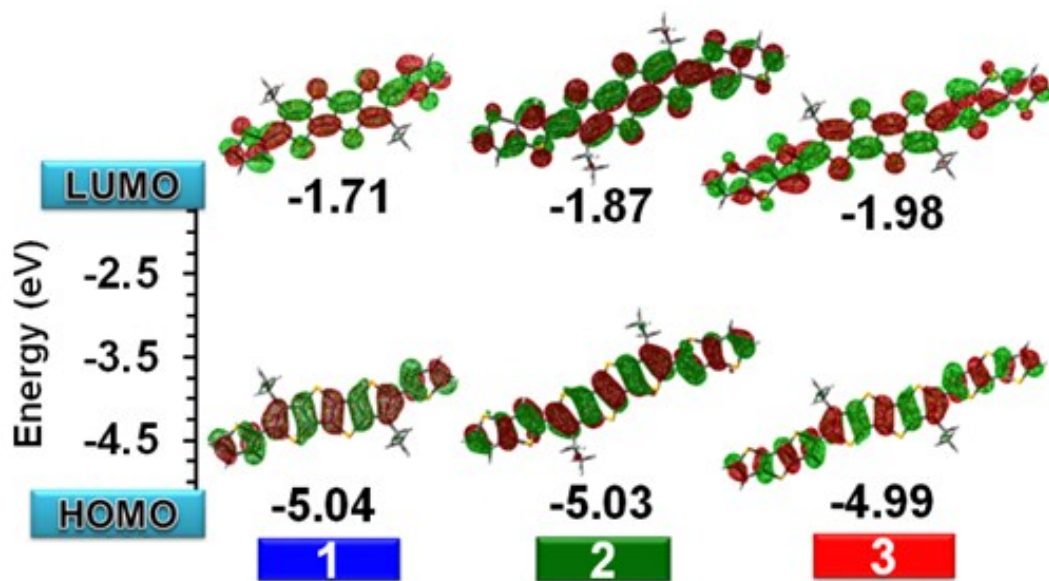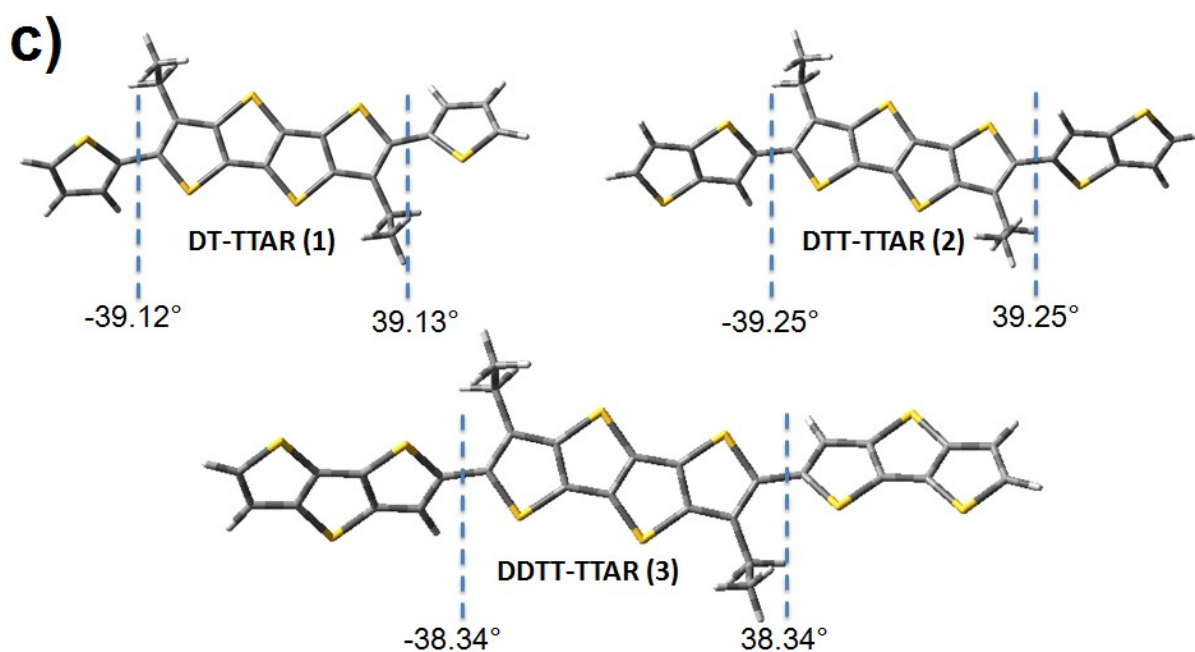

**Fig. S3** (a) DFT-derived molecular orbital contours of three **TTARs** and their calculated HOMO and LUMO energy levels. (b) Dihedral angles of three **TTARs** from DFT calculations.



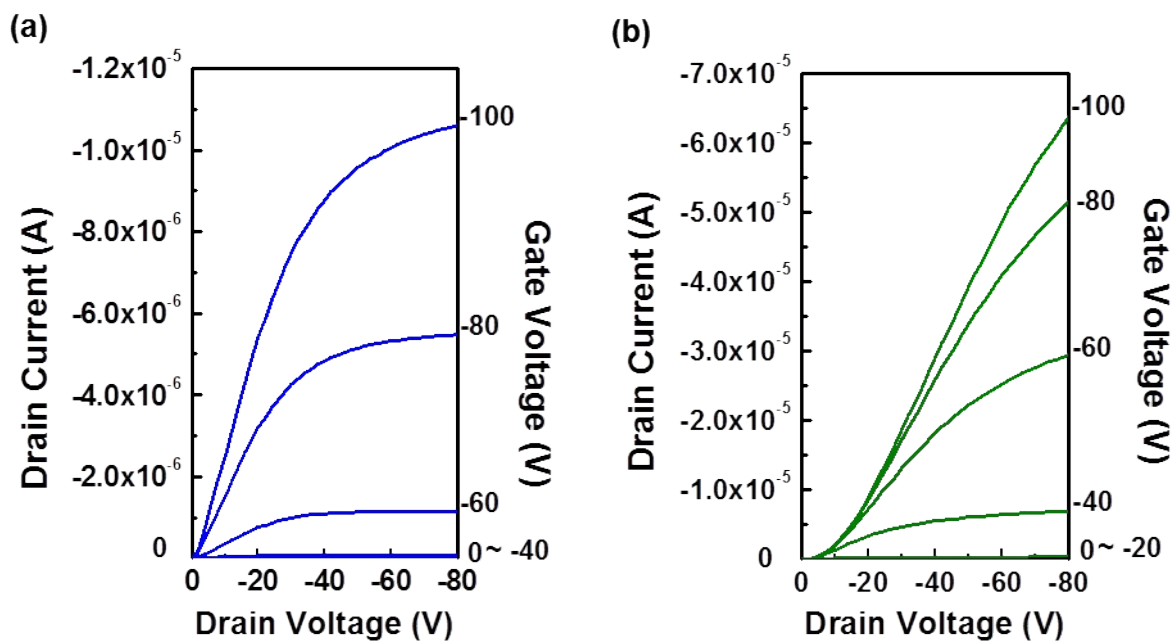

Fig. S4 Output characteristics of (a) DT-TTAR and (b) DTT-TTAR OFETs.

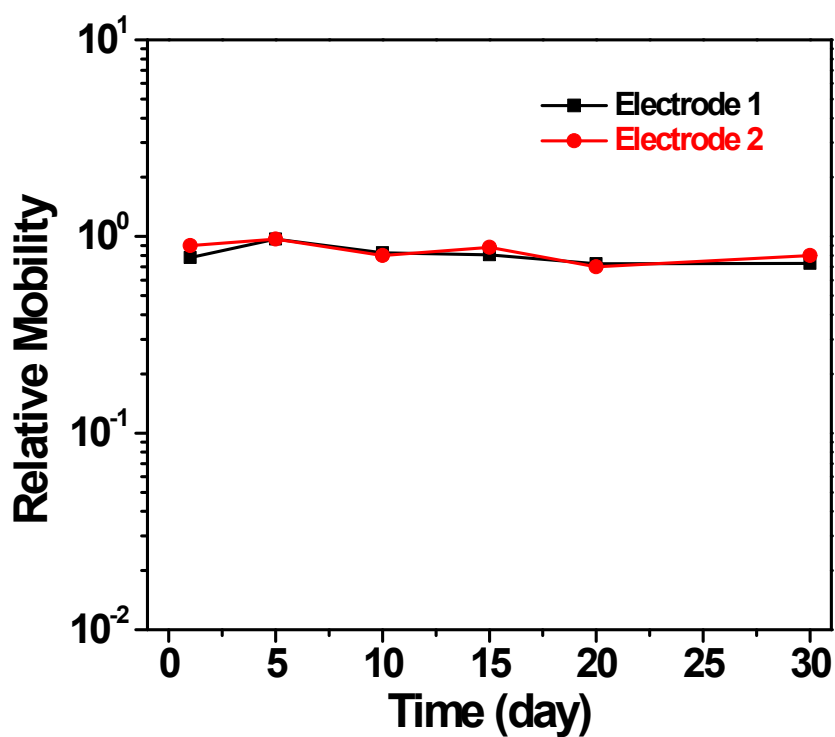

Fig. S5 Long term environmental stability of DDTT-TTAR OFETs in different batches, stored in ambient atmosphere.

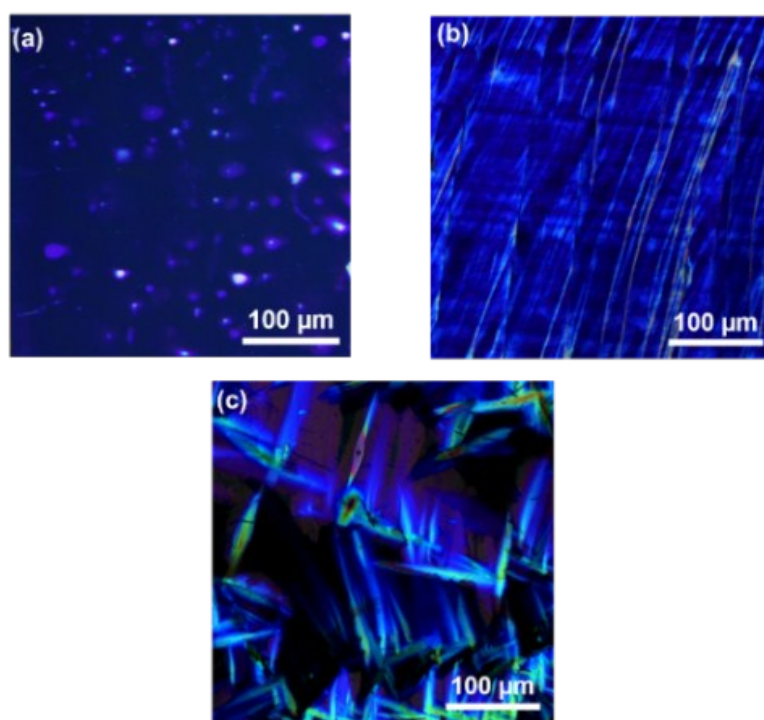

**Fig. S6** POM image of solution-sheared (a) **DT-TTAR**, (b) **DTT-TTAR** and (c) **DDTT-TTAR** thin film.

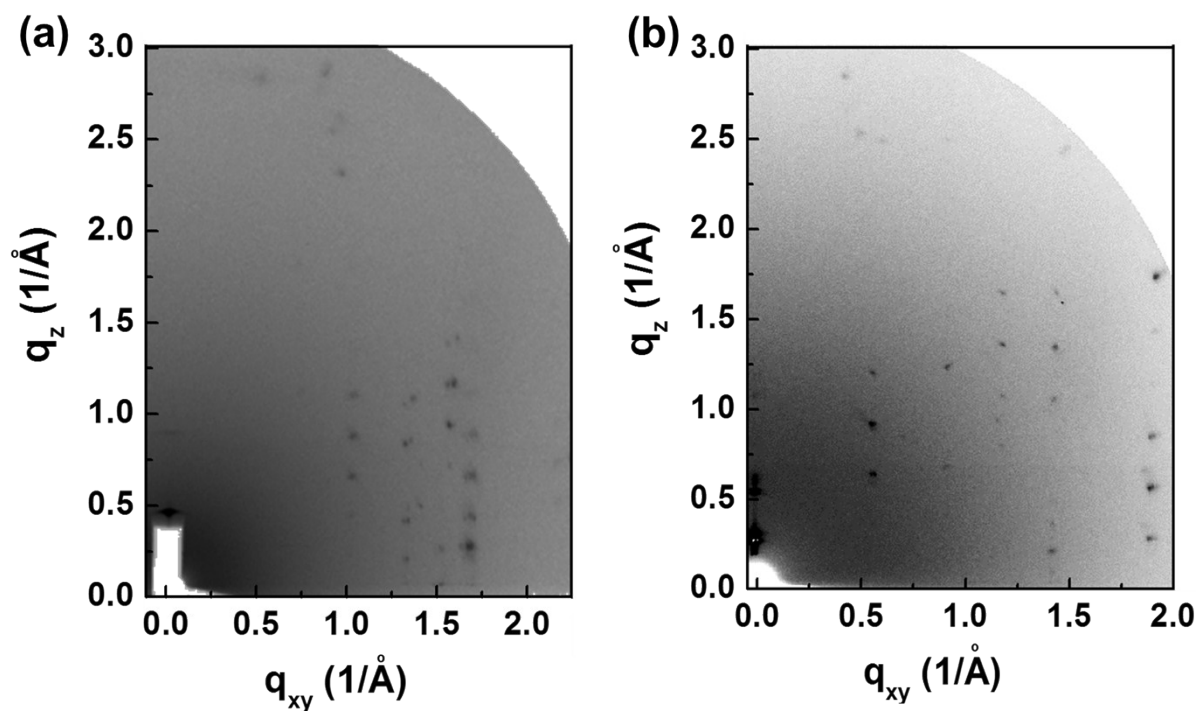

Fig. S7 GIXRD diffraction pattern image of solution-sheared (a) **DT-TTAR** and (b) **DTT-TTAR** thin film.

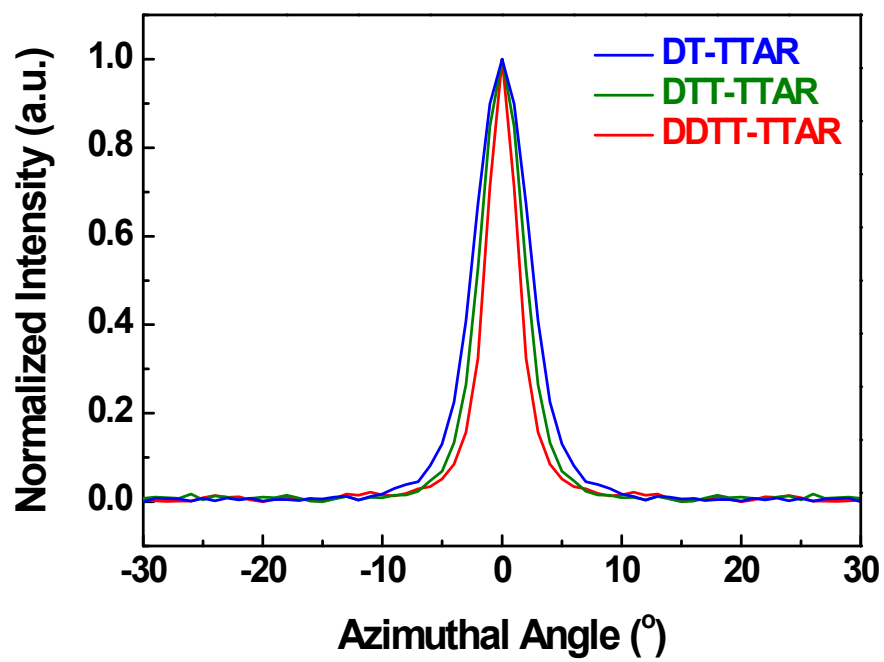

Fig. S8 X-ray diffraction (002) azimuthal scan profiles.

**Fig. S9**  $^1\text{H}$  NMR spectrum of DT-TTAR, DTT-TTAR, and DDTT-TTAR.

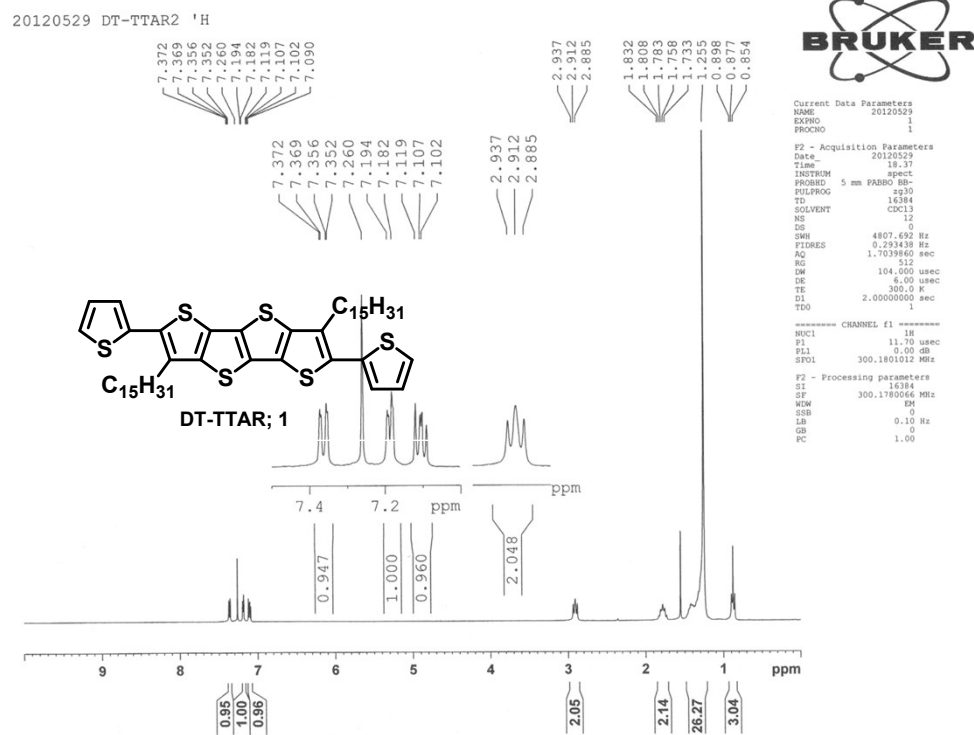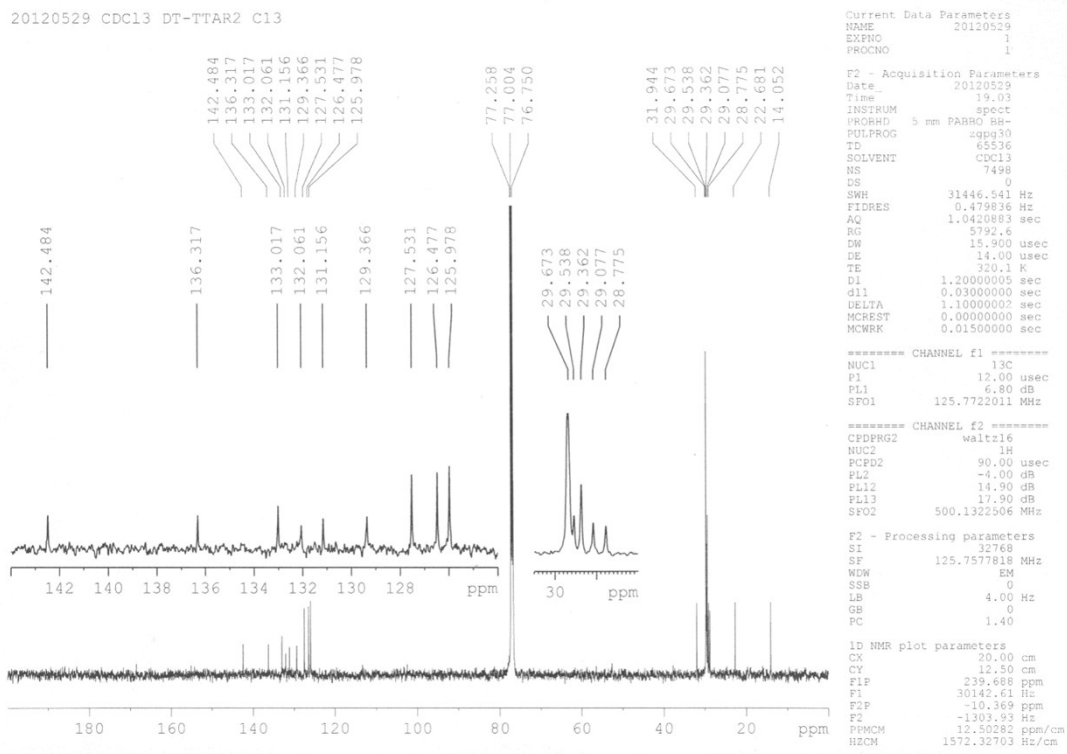

20120530 CDC13 DTT-TTAR2 'H

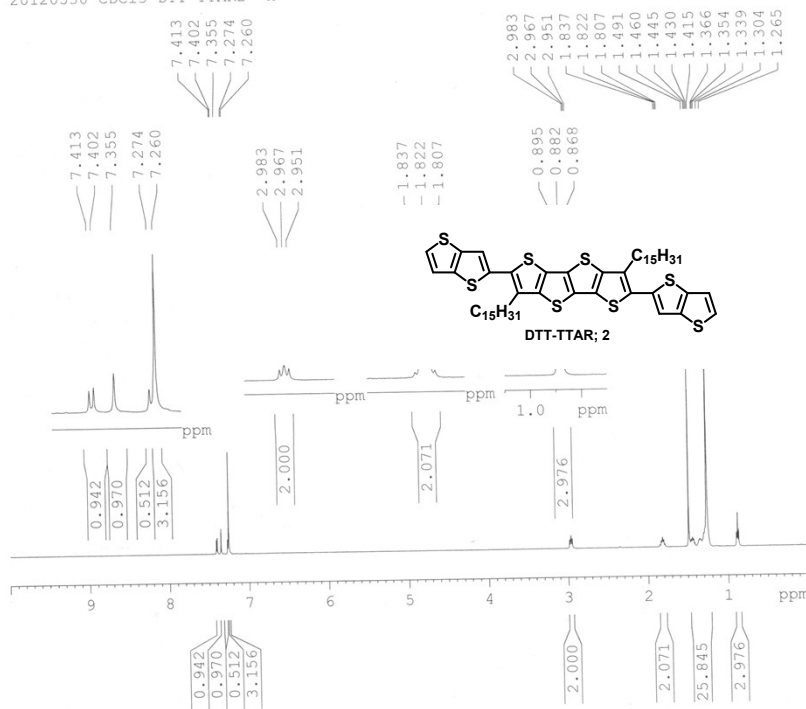

Current Data Parameters  
 NAME 20120530  
 EXPNO 3  
 PROCNO 1

F2 - Acquisition Parameters  
 Date 20120530  
 Time 23.05  
 INSTRUM spect  
 PROBHD 5 mm PABBO BB-  
 PULPROG zg30  
 TD 16384  
 SOLVENT CDC13  
 NS 16  
 DS 0  
 SWH 7507.507 Hz  
 FIDRES 0.458222 Hz  
 AQ 1.0912910 sec  
 RG 724.1  
 DW 66.600 usec  
 DE 14.00 usec  
 TE 320.0 K  
 D1 1.50000000 sec  
 MCREST 0.00000000 sec  
 MCWRK 0.01500000 sec

===== CHANNEL f1 =====  
 NUC1 1H  
 P1 9.50 usec  
 PL1 -4.00 dB  
 SFO1 500.1332508 MHz

F2 - Processing parameters  
 SI 16384  
 SF 500.1300121 MHz  
 WDW EM  
 SSB 0  
 LB 0.10 Hz  
 GB 0  
 PC 1.00

### <sup>1</sup>H NMR (CDCl<sub>3</sub>) of DTT-TTAR (2)

20120530 CDC13 DTT-TTAR2 C13

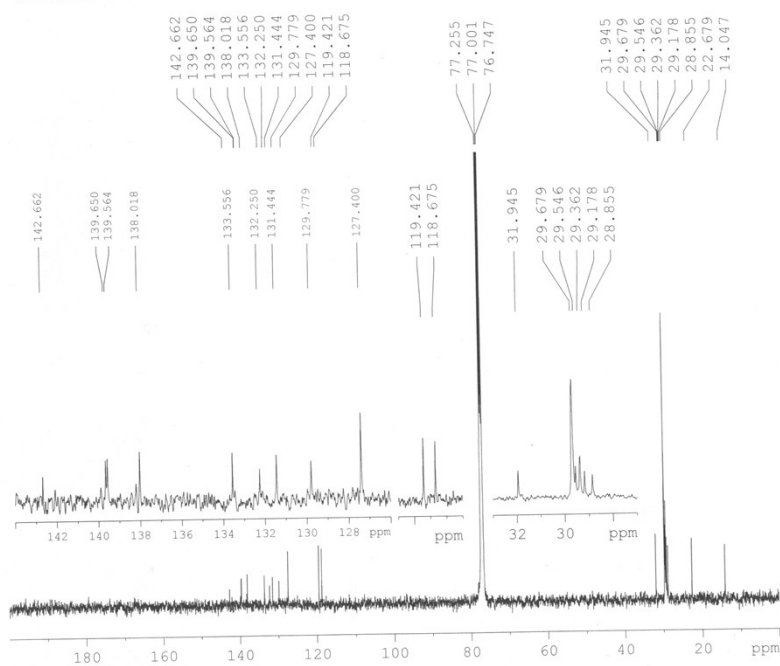

Current Data Parameters  
 NAME 20120530  
 EXPNO 4  
 PROCNO 1

F2 - Acquisition Parameters  
 Date 20120530  
 Time 23.25  
 INSTRUM spect  
 PROBHD 5 mm PABBO BB-  
 PULPROG zgpg30  
 TD 65536  
 SOLVENT CDC13  
 NS 15273  
 DS 0  
 SWH 31446.514 Hz  
 FIDRES 0.479836 Hz  
 AQ 1.0420883 sec  
 RG 13004  
 DW 15.900 usec  
 DE 14.00 usec  
 TE 320.1 K  
 D1 1.20000005 sec  
 d11 0.03000000 sec  
 DELTA 1.10000002 sec  
 MCREST 0.00000000 sec  
 MCWRK 0.01500000 sec

===== CHANNEL f1 =====  
 NUC1 13C  
 P1 12.00 usec  
 PL1 6.80 dB  
 SFO1 125.7722011 MHz

===== CHANNEL f2 =====  
 CPDPRG2 waltz16  
 NUC2 1H  
 PCPD2 90.00 usec  
 PL2 -4.00 dB  
 PL12 14.90 dB  
 PL13 17.90 dB  
 SFO2 500.1322506 MHz

F2 - Processing parameters  
 SI 32768  
 SF 125.7577809 MHz  
 WDW EM  
 SSB 0  
 LB 4.00 Hz  
 GB 0  
 PC 1.40

1D NMR plot parameters  
 CX 20.00 cm  
 CY 12.50 cm  
 F1P 239.695 ppm  
 F1 30143.56 Hz  
 F2P -10.361 ppm  
 F2 -1302.98 Hz  
 PPMCM 12.50282 ppm/cm  
 HZCM 1572.32703 Hz/cm

### <sup>13</sup>C NMR (CDCl<sub>3</sub>) of DTT-TTAR (2)

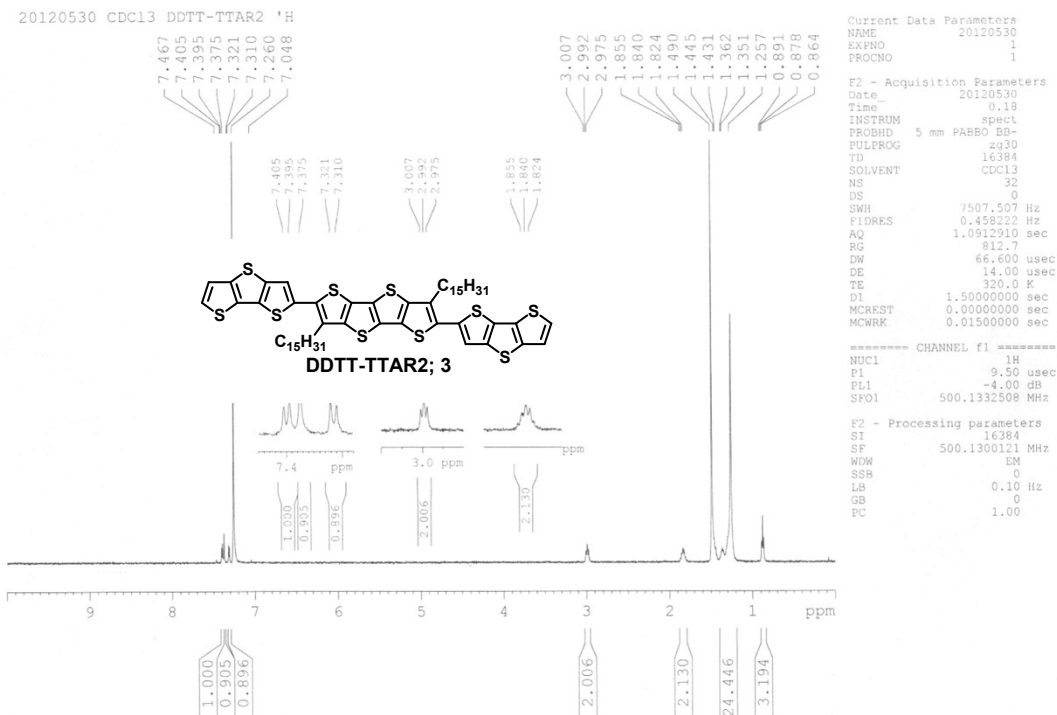

**<sup>1</sup>H NMR (CDCl<sub>3</sub>) of DDTT-TTAR (3)**

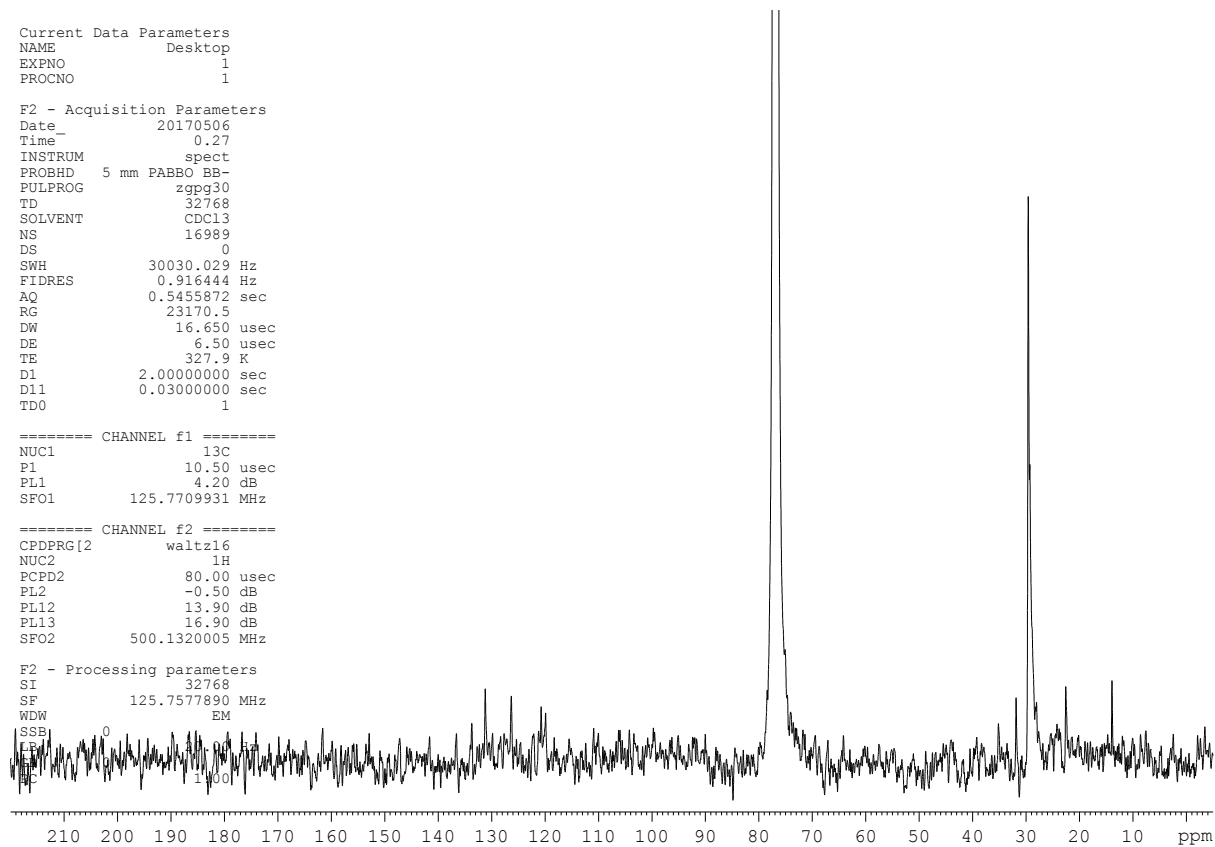

**<sup>13</sup>C NMR (CDCl<sub>3</sub>) of DDTT-TTAR (3) (Poor solubility)**
